# Supplementary material
Source: Springer Nature journal article supplement (https://www.springermedizin.de/resource/supplementary/12916_2009_210_MOESM5_ESM.pdf/9599400)

Review : Clinical pathway and total hip and knee arthroplasty

Comparison: 02 Care Pathway vs standard care

Outcome: 01 Postoperative complications

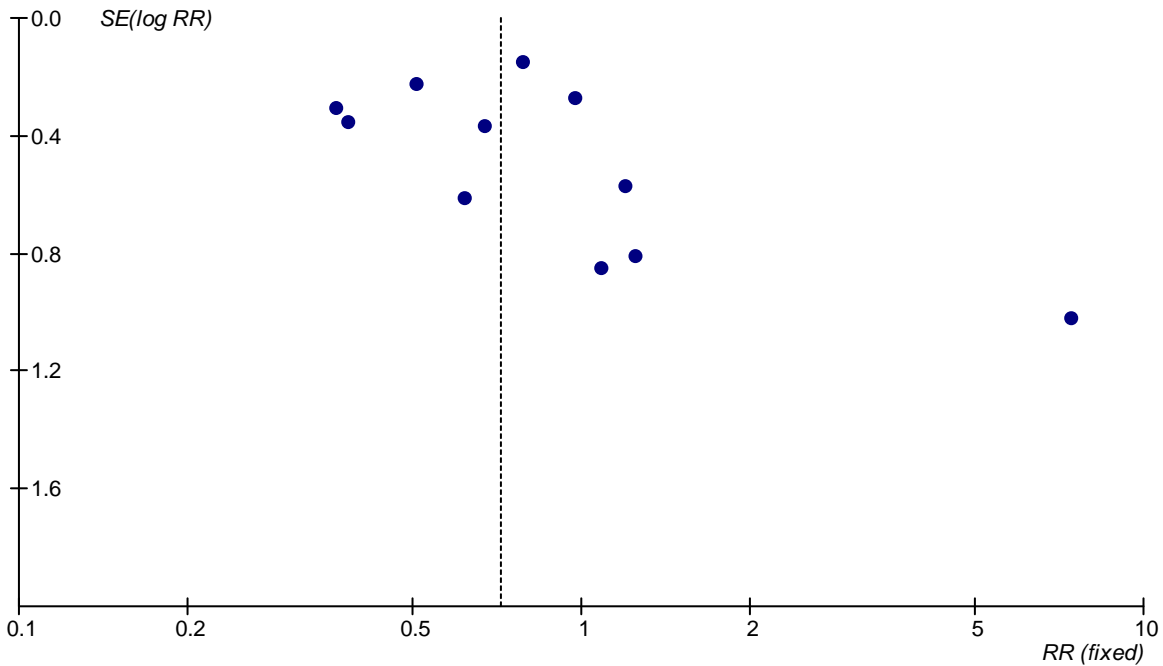

Supplement: MOESM5 [file 9599400]
